# Supplementary material for: Association of UCP1 and UCP2 Variants With Diabetic Retinopathy Susceptibility in Type-2 Diabetes Mellitus Patients: A Meta-analysis
Source: Research Square preprint supplement (doi:10.21203/rs.3.rs-134894/v1), 2020-12-29
Supplement: Supplementary file 1 [file 9af5bd8f52c26d002d4c69c0.xlsx]

## Sheet: Sheet1
Table 5 Evaluation of publication bias by Egger's test
	Cases vs. Control	Allele model	Homozygous model	Heterogeneity model	Dominant model	Recessive model
rs1800592	DR vs. DWR	0.515	0.97	0.417	0.763	0.657
rs659366	DR vs. DWR	0.68	0.687	0.755	0.77	0.702
